# Supplementary material for: isomiRTar: a comprehensive portal of pan-cancer 5′-isomiR targeting
Source: PeerJ. 2022 Oct 17;10:e14205. doi: 10.7717/peerj.14205 (PMC9583861; doi:10.7717/peerj.14205)
Supplement: Supplemental Information 3 [file peerj-10-14205-s003.xlsx]

## Sheet: Sheet1
TCGA project	Sample size	Number of highly expressed 5′-isomiRs
TCGA-ACC	79	65
TCGA-BLCA	400	57
TCGA-BRCA	1058	56
TCGA-CESC	304	60
TCGA-CHOL	36	51
TCGA-COAD	426	55
TCGA-DLBC	47	56
TCGA-ESCA	159	55
TCGA-HNSC	495	56
TCGA-KICH	65	41
TCGA-KIRC	489	47
TCGA-KIRP	288	39
TCGA-LGG	506	34
TCGA-LIHC	367	58
TCGA-LUAD	497	58
TCGA-LUSC	474	64
TCGA-MESO	86	48
TCGA-OV	370	58
TCGA-PAAD	177	55
TCGA-PCPG	178	61
TCGA-PRAD	487	38
TCGA-READ	159	57
TCGA-SARC	257	48
TCGA-SKCM	97	77
TCGA-STAD	361	56
TCGA-TGCT	134	118
TCGA-THCA	501	61
TCGA-THYM	119	92
TCGA-UCEC	530	66
TCGA-UCS	56	84
TCGA-UVM	80	66
